# Supplementary material for: Poly(acrylic acid)-mediated synthesis of cerium oxide nanoparticles with variable oxidation states and their effect on regulating the intracellular ROS level
Source: Royal Society of Chemistry journal article supplement (doi:10.1039/d1tb00706h), 2021-01-01
Supplement: d1tb00706h1.pdf [file d1tb00706h1.pdf]

**Supplemental Information for:**

**Poly (acrylic acid)-mediated synthesis of cerium oxide nanoparticles with  
tuneable oxidation state and their effect of regulating intracellular ROS level**

Xiaohui Ju,<sup>\*a</sup> Marie Hubálek Kalbáčová,<sup>\*b,c</sup> Břetislav Šmíd,<sup>a</sup> Viktor Johánek,<sup>a</sup> Martin Janata,<sup>a</sup> Thu  
Ngan Dinhová,<sup>a</sup> Tereza Bělinová,<sup>c</sup> Michal Mazur,<sup>d</sup> Maryna Vorokhta,<sup>e</sup> and Ladislav Strnad<sup>f</sup>

*a. Department of Surface and Plasma Science, Faculty of Mathematics and Physics, Charles  
University, Prague, Czech Republic*

*b. Institute of Pathological Physiology, 1st Faculty of Medicine, Charles University, Prague,  
Czech Republic*

*c. Biomedical Center, Medical Faculty in Pilsen, Charles University, Pilsen, Czech Republic*

*d. Department of Physical and Macromolecular Chemistry, Faculty of Sciences, Charles  
University, Prague, Czech Republic*

*e. Department of Geochemistry, Institute of Rock Structure and Mechanics, Czech Academy of  
Sciences, Prague, Czech Republic*

*f. Laboratories of the Geological Institutes, Charles University, Prague, Czech Republic*

\*Corresponding email: [xiaohui.ju@mff.cuni.cz](mailto:xiaohui.ju@mff.cuni.cz), [marie.kalbacova@lf1.cuni.cz](mailto:marie.kalbacova@lf1.cuni.cz)

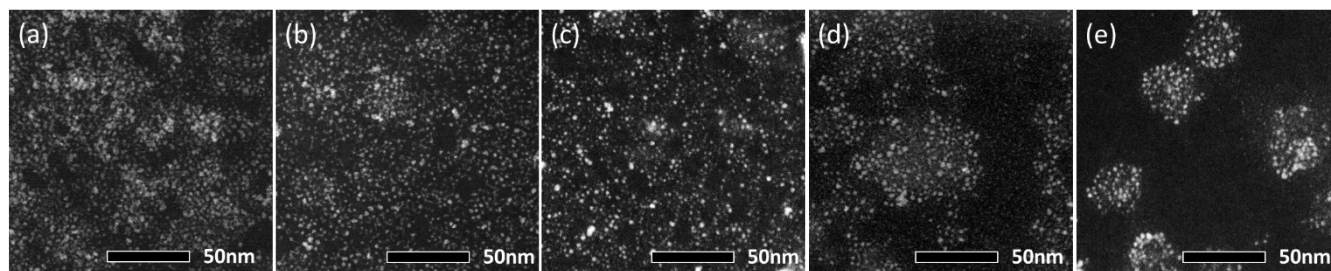

**Fig. S1.** STEM images of PAA-CeNPs at a lower magnification: (a) PAA-CeNPs-5°C; (b) PAA-CeNPs-25°C; (c) PAA-CeNPs-45°C; (d) PAA-CeNPs-65°C; and (e) PAA-CeNPs-85°C. PAA-CeNPs synthesized under lower temperature (up to 45°C) are monodispersed. PAA-CeNPs synthesized at 65°C and 85°C start to show slight PAA-bridging effect among CeNPs. It is more clear in the sample of PAA-CeNPs-85°C, where agglomeration in the size of 30 nm can be seen (e).

**Table S1. Calculation for the number of PAA per CeNPs**

| Sample name    | Ce element (%) <sup>a</sup> | Ce <sup>3+</sup> (%) <sup>b</sup> | x (CeO <sub>x</sub> ) | CeO <sub>x</sub> (%) | PAA (%) | PAA-CeNPs No. CeNPs (m) | PAA-CeNPs No. PAA (n) | No. PAA per CeNPs |
|----------------|-----------------------------|-----------------------------------|-----------------------|----------------------|---------|-------------------------|-----------------------|-------------------|
| PAA-CeNPs-5°C  | 53.3                        | 19                                | 1.91                  | 64.9                 | 35.1    | 2.1E+16                 | 1.1E+17               | 8.2               |
| PAA-CeNPs-25°C | 52.5                        | 22                                | 1.89                  | 63.8                 | 36.2    | 2.1E+16                 | 1.1E+17               | 8.6               |
| PAA-CeNPs-45°C | 50.0                        | 30                                | 1.85                  | 60.6                 | 39.4    | 2.0E+16                 | 1.2E+17               | 9.9               |
| PAA-CeNPs-65°C | 46.8                        | 34                                | 1.83                  | 56.6                 | 43.4    | 1.9E+16                 | 1.3E+17               | 11.7              |
| PAA-CeNPs-85°C | 45.4                        | 37                                | 1.82                  | 54.8                 | 45.2    | 1.8E+16                 | 1.4E+17               | 12.5              |

Footnote: <sup>a</sup> Measured by ICP-MS. <sup>b</sup> Measured by XPS.

**Calculation steps for No. PAA per CeNPs:**

Assume all CeNPs has a core size of 2 nm:

Surface area of one nanoparticle =  $4\pi r^2 = 12.6 \text{ nm}^2$

Volume of one nanoparticle =  $\frac{4}{3} \pi r^3 = 4.2 \text{ nm}^3$

Density of ceria =  $7.22 \text{ g cm}^{-3}$

For  $1 \text{ mg ml}^{-1}$  CeNPs, assume that the CeO<sub>x</sub> concentration is m%,

the number of CeNPs =  $(m/100) (\text{mg ml}^{-1}) / (7.22 \text{ g cm}^{-3}) / (4.2 \text{ nm}^3) * 6.02 \times 10^{23} = (3.3*m) \text{ E}+16$

For  $1 \text{ mg ml}^{-1}$  CeNPs, assume that the PAA concentration is n%,

the number of PAA chains =  $(n/100) (\text{mg ml}^{-1}) / 1200 \text{ g mol}^{-1} * 6.02 \times 10^{23} = (5*n) \text{ E}+17$

No. PAA per CeNPs =  $(5*n) \text{ E}+17 / (3.3*m) \text{ E}+16 = 15.1 * (n/m)$

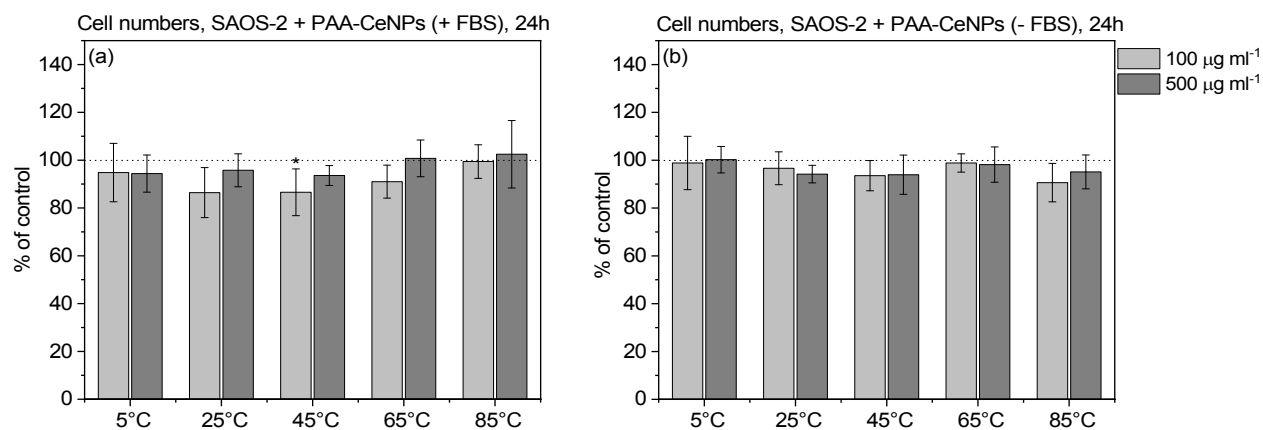

**Fig S2.** Cell number of SAOS-2 incubated with PAA-CeNPs synthesized at different temperatures (5, 25, 45, 65, and 85 °C) under (a) standard (+ FBS), and (b) non-standard (- FBS) conditions. Cell numbers were represented by DNA content measured by CyQUANT NF Cell Proliferation Assay Kit. Relative values are expressed as a percentage of the control sample (untreated cells in adequate cultivation medium). The star symbol (\*) highlighted a significant difference from the control sample (Wilcoxon matched-pairs test,  $p < 0.05$ ). The dotted line shows 100% control.
